# Supplementary material for: Efficient visible-light-driven hydrogen production by Zn–porphyrin based photocatalyst with engineered active donor–acceptor sites
Source: Royal Society of Chemistry journal article supplement (doi:10.1039/d1ma00342a), 2021-01-01
Supplement: d1ma00342a1.pdf [file d1ma00342a1.pdf]

## Supporting Information

### Structural characterization:

The phase structure and crystallinity of the prepared catalysts were observed by Powdered X-ray diffraction (XRD) analysis. The Powdered X-ray diffraction were recorded on a Bruker AXS diffractometer (D8 advance) at a generator voltage of 40kv and 30 mA current using  $\text{Cu-K}\alpha$  radiation ( $\lambda=1.5406 \text{ \AA}$ ). The samples were scanned in the range of ( $2\theta=5-100$ ) with the scan rate 1s/step. Field emission scanning electron microscopic (FESEM) characterization was done on FEI Nova Nano SEM-450. Transmission electron Microscopy (TEM) image of the representative TNR sample was obtained by using a JEOL 2010EX TEM instrument equipped with the high resolution objective –lens pole piece at an acceleration voltage of 200Kv fitted with a CCD camera. The optical properties were characterized by using UV-vis diffuse reflectance spectroscopy (DRS) Perkin Elmer Lambda 750) equipped with an integral sphere using  $\text{BaSO}_4$  as a reference. Fourier transmission infrared spectroscopy were carried by FTIR-6800 is JASCO Europe Italy. Photo electro chemical properties were carried by CH instrument model CHI660C, Shanghai Chenhua Device Company, Time –Resolved Electrochemical instrument using a 450 W xenon arc lamp (Newport, USA). GC analysis was performed by gas chromatograph TCD detector (Perkin Elmer Clarus 590 GC containing molecular Sieve/5 $\text{\AA}$  column) using nitrogen ( $\text{N}_2$ ) as carrier gas.

### Platinization Calculation:

0.25 mL of  $\text{H}_2\text{PtCl}_6$  from 8wt % aqueous solution:

$$\text{Density} = \text{mass/volume (d=m/v)}$$

$$V=m/d$$

$$\text{Mass of } \text{H}_2\text{PtCl}_6 = 100\text{g(given)}$$

$$\text{Density of 1w\%} = 1.05\text{g/cm}^3$$

$$V=100/1.05$$

1g of  $\text{TiO}_2$  (1w%) is taken 10 mg,

1w% of platinum M. Wt is 195.084 g in  $\text{H}_2\text{PtCl}_6$ , M. Wt is 409.81g/mol  
therefore 10mg platinum =  $409.81 \times 10 / 195.084$

$$= 21.0068\text{mg is required for 10mg of platinum.}$$

$$= 95.23\text{cm}^3 \text{ this is only 1w\% of } \text{H}_2\text{PtCl}_6.$$

$$\frac{95.23 \times 21.0068}{8 \times 1000}$$

=0.25ml platinum from 8w% of H<sub>2</sub>PtCl<sub>6</sub>.

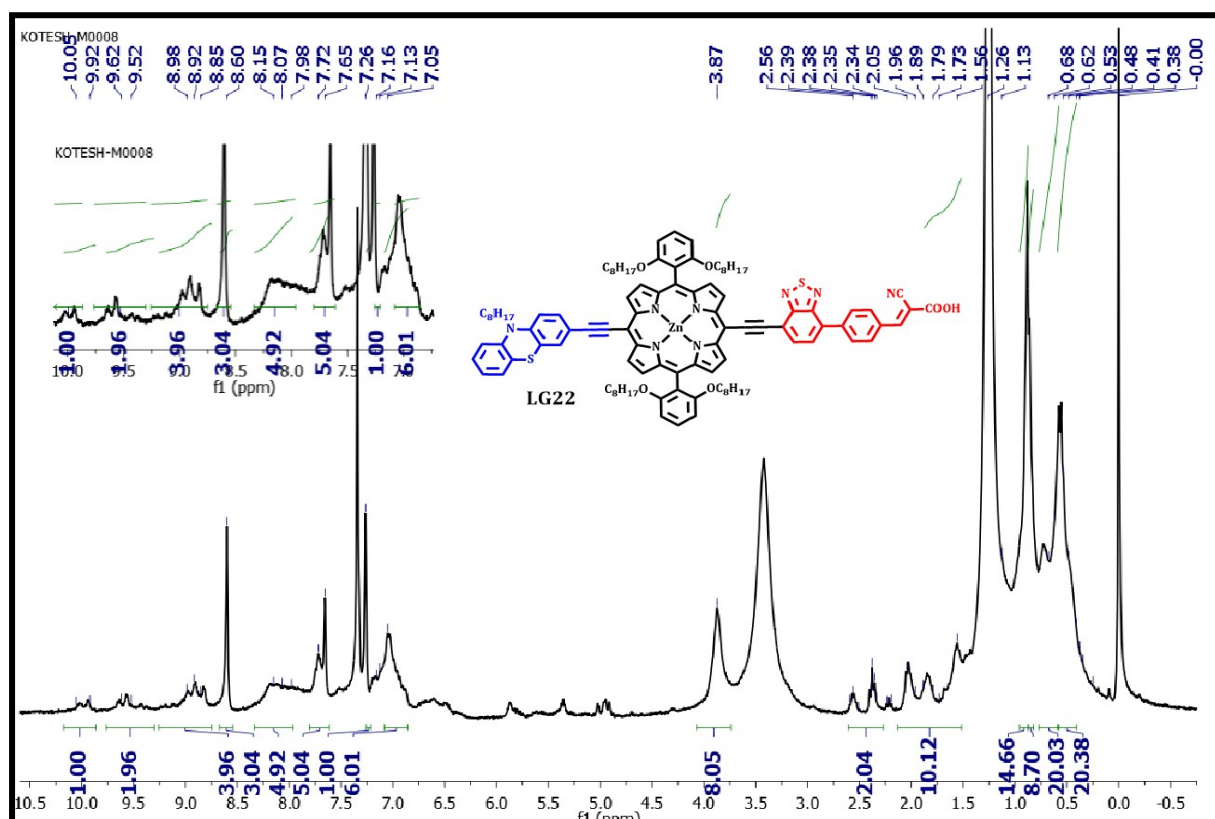

Figure S1. <sup>1</sup>H NMR spectrum (500 MHz, CDCl<sub>3</sub>+ C<sub>5</sub>D<sub>5</sub>N) of LG22.

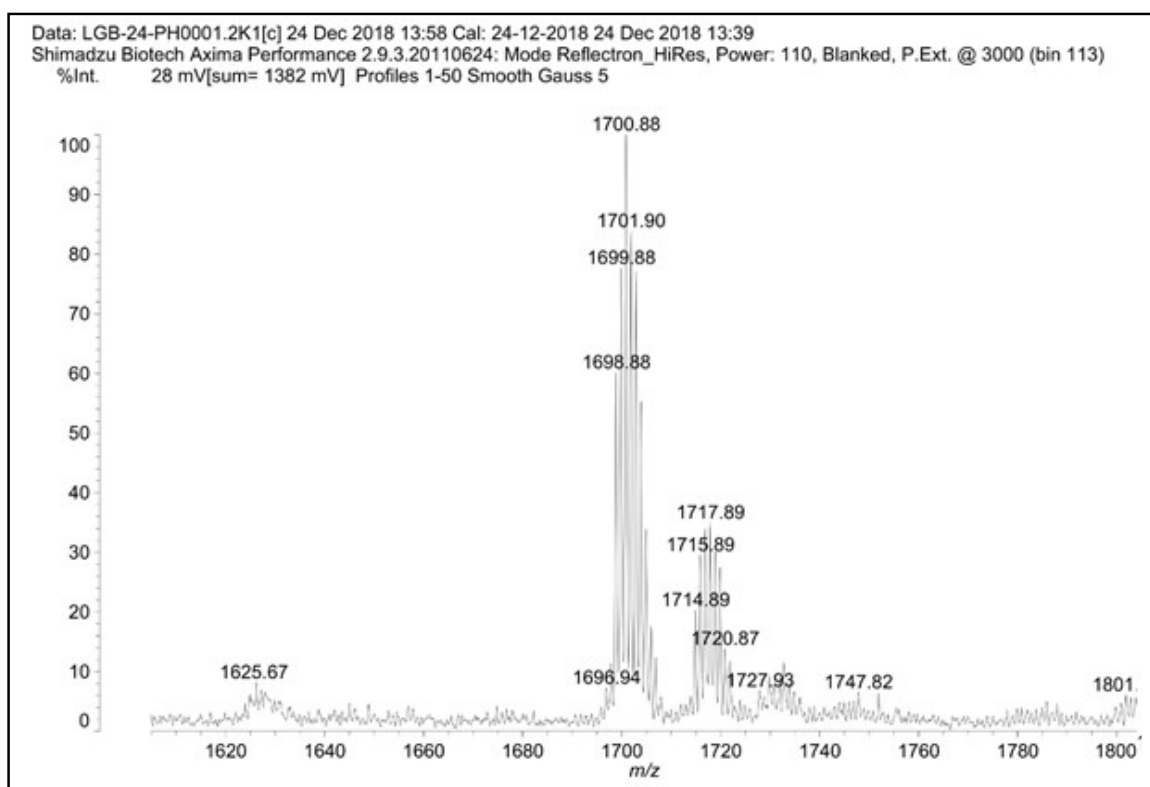

Figure S2. MALDI-TOF of LG22.

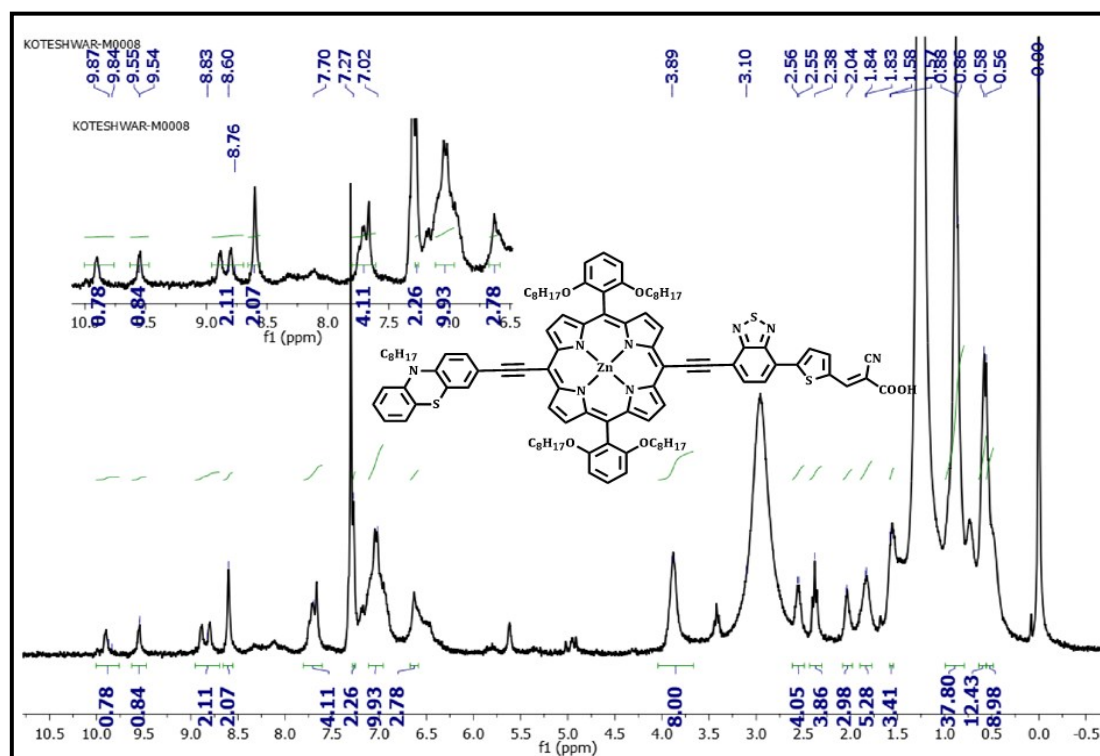

Figure S3.  $^1\text{H}$  NMR spectrum (500 MHz,  $\text{CDCl}_3 + \text{C}_5\text{D}_5\text{N}$ ) of LG23.

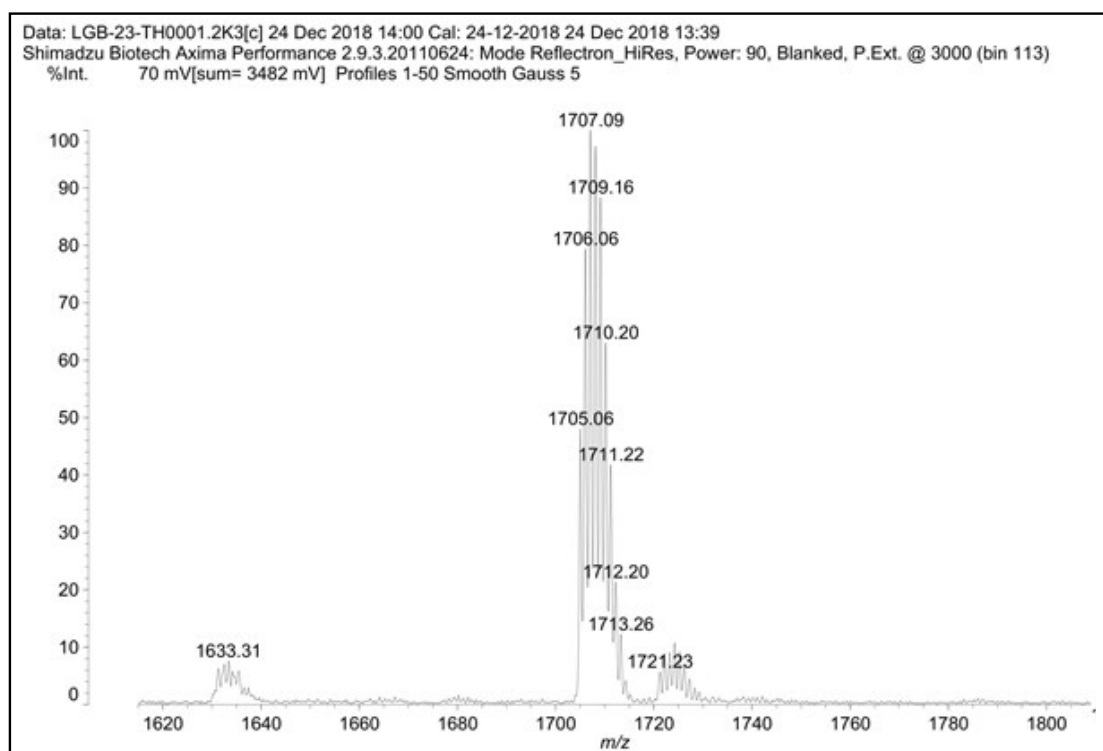

Figure S4. MALDI-TOF of LG23

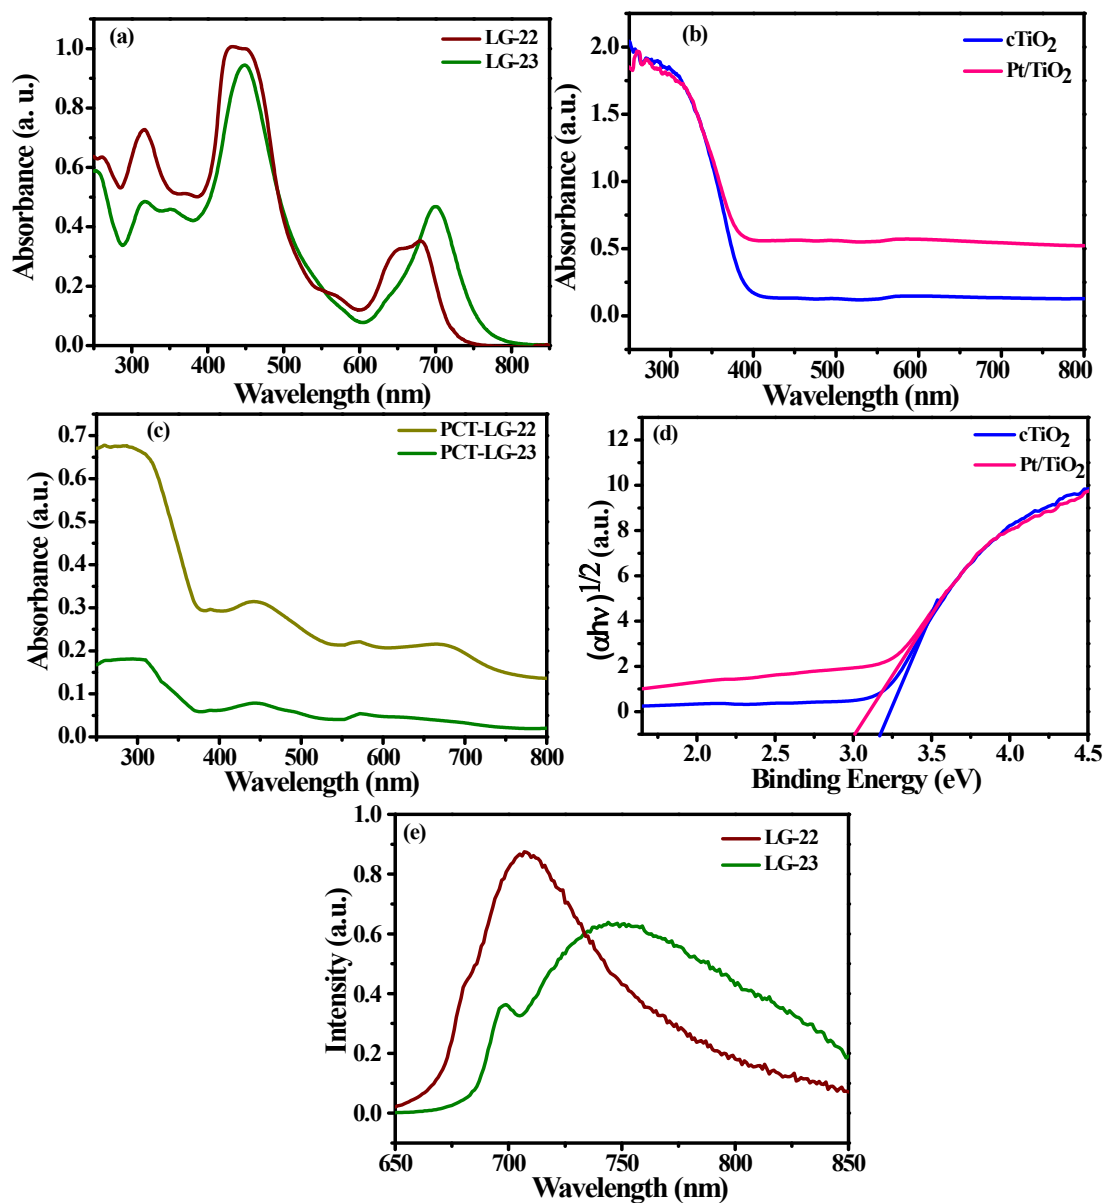

**Figure S5:** (a) UV-vis absorption spectra of LG-22, LG-23, UV-vis DRS of (b) cTiO<sub>2</sub> and Pt/TiO<sub>2</sub> (c) PCT-LG-22, PCT-LG-23, Tauc Plot of (d) cTiO<sub>2</sub>, Pt/TiO<sub>2</sub>, (e) Photoluminescence of PCT-LG-22, PCT-LG-23.

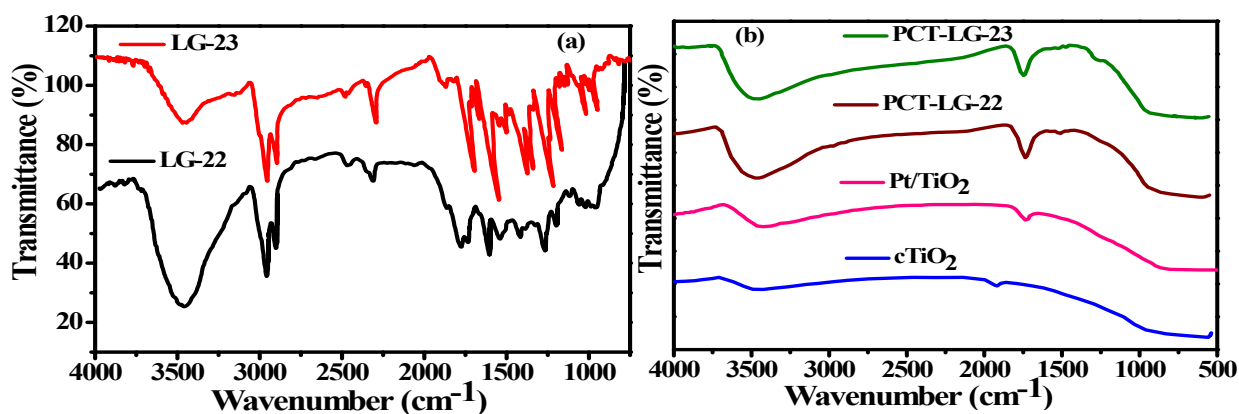

**Figure. S6:** FTIR analysis of (a) LG-22 and LG-23 dyes, and (b) cTiO<sub>2</sub>, Pt/TiO<sub>2</sub>, PCT-LG-22 and PCT-LG-23.

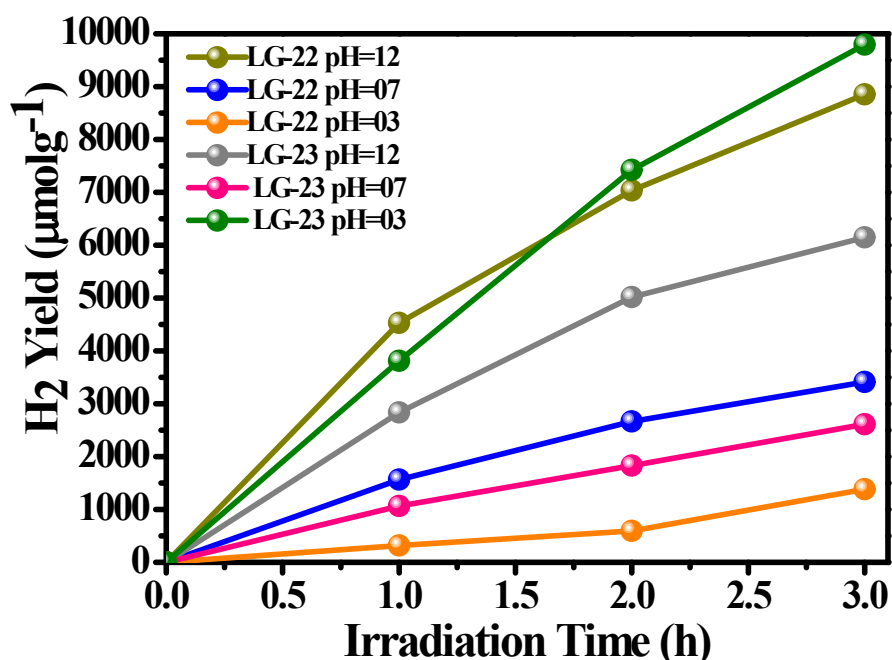

**Figure. S7:** Time Course for the photocatalytic hydrogen generation.

### Photocatalytic Water Splitting Reaction: Hydrogen production calculation

Therefore, the TON can be calculated according to equation (1).

$$TON = \frac{\text{Number of dye molecules adsorbed}}{2 \times \text{number of evolved H}_2 \text{ molecules}} \quad (1)$$

The apparent quantum yields (AQY) are calculated according to the following equation (2).

$$AQY(\%) = \frac{H_2 \text{ molecules of evolved} \times 2}{\text{incident photons}} \text{ (or) } \frac{2X \text{ Rate}}{N} \times 100 \quad (2)$$

Standard area of pure hydrogen gas (H<sub>2</sub>) = 3039348.66 × mL

In atmospheric condition at normal temperature pressure (NTP) = 22.4 mL

$$1 \text{ m.mol} = 22.4 \text{ mL}$$

0.1 mL (or) 1 m.ml Standard area of pure hydrogen gas (H<sub>2</sub>) = 3039348.66 mL

$$? = x \text{ mL}$$

$$= \frac{0.1 \text{ ml} \times X}{3039348.60 \times 22.4} = 1.4688 \times 10^{-9} \text{ m.ml} \times X$$

75 mL pyrex glass containing empty space = 55 mL due to 20 mL catalytic solution

$$1.4688 \times 10^{-9} \text{ m.ml} \times X = 1 \text{ mL}$$

$$? = 0.1 \text{ mL}$$

$$1.4688 \times 10^{-9} \text{ m.ml} / 0.1 \text{ mL} / 1 \text{ mL}$$

$$= 1.4688 \times 10^{-8} \times X$$

$$= 1.4688 \times 10^{-5} \times X \text{ m.ml}$$

$$= 0.014688 \times 10^{-3} \times X \mu.\text{ml}$$

$$10 \text{ mg of catalyst} = 0.014688 \times 10^{-3} \times X \mu.\text{ml}$$

$$55 \text{ ml empty space} = ?$$

$$H_2 = \frac{0.014688 \times 10^{-3} \times 55 \mu.\text{ml}}{10 \text{ mg}}$$

$$= \frac{0.014688 \times 10^{-3} \times 55 \mu.\text{ml} \times 1000}{10 \text{ mg}}$$

$$= 0.08078 \mu.\text{ml} / \text{g} \times X$$

### Calculation of Number of incident proton 'N'

$$N = \frac{E\lambda}{hc}$$

$$E = Nh\nu \text{ (according to plank equation)}$$

$$\nu = \frac{c}{\lambda}$$

$$E = Nh\frac{c}{\lambda}$$

E=Incident light of radiation

$E = 2.75 \times 10^{-3}$  joule

$\lambda$ =wave length of light(420nm)

$h$  = plank constant ( $6.626 \times 10^{-34}$ js) or  $6.626 \times 10^{-27}$  erg-s

$c$ =speed of light( $3 \times 10^8$ m/s) or  $3 \times 10^{10}$  cm/s

Surface area of reactor= $6.5 \text{ cm}^2$

Irradiation time=4hours

$$N = \frac{2.75 \times 10^{-3} \text{ j} \times 420 \times 10^{-9} \text{ m} \times 6.5 \text{ m}^2 \times 4 \times 3600 \text{ s}}{6.626 \times 10^{-34} \text{ js} \times 3 \times 10^8 \text{ m/s}} \text{ m/s}$$

$$N = \frac{2.75 \times 10^{-3} \text{ j} \times 420 \times 10^{-7} \text{ cm} \times 6.5 \text{ cm}^2 \times 4 \times 3600 \text{ s}}{6.626 \times 10^{-34} \text{ j-s} \times 3 \times 10^{10} \text{ cm/s}}$$

$$N = 5.43 \times 10^{13}$$

**Table S1:** Comparison of photocatalytic hydrogen generation efficiency of different reported photosensitizers

| Sl. No | Photocatalyst                                     | Light Source                                                       | pH | SED              | H <sub>2</sub> Yield                        | TON  | AQY (%) | Reference |
|--------|---------------------------------------------------|--------------------------------------------------------------------|----|------------------|---------------------------------------------|------|---------|-----------|
| 1      | Zn-CoDETPP                                        | 300W Xe lamp                                                       | -  | TEOA             | 43 $\mu\text{mol h}^{-1}$                   | -    | 7.36    | 1         |
| 2      | [ZnTMPyP] <sup>4+-</sup><br>MoS <sub>2</sub> /RGO | 300W Xe lamp                                                       | 7  |                  | 2560 $\mu\text{mol h}^{-1} \text{ g}^{-1}$  | -    | 15.2    | 2         |
| 3      | ZnTCPP-MoS <sub>2</sub> /TiO <sub>2</sub>         | 300W Xe-lamp equipped with a cut-off filter ( $\lambda > 420$ nm). | 8  | TEOA             | 10.2                                        | 261  | -       | 3         |
| 4      | YD2-o-C8                                          | LED                                                                | 4  | Ascorbic Acid    | 47700 $\mu\text{mol g}^{-1} \text{ h}^{-1}$ | 2370 | 1.22    | 4         |
| 5      | PdTAPP-TFPT                                       | 300 W Xe lamp                                                      |    | sodium ascorbate | 30880 $\mu\text{mol g}^{-1}$                | -    | 0.75    | 5         |
| 6      | Pt/THPP-Zn-TiO <sub>2</sub>                       | 300W Xe Lamp                                                       | -  | TEOA             | 1239.8 $\mu\text{mol}$                      | -    | -       | 6         |

|           |                                 |                        |           |             |                                           |                 |              |                  |
|-----------|---------------------------------|------------------------|-----------|-------------|-------------------------------------------|-----------------|--------------|------------------|
|           |                                 |                        |           |             | $\text{g}^{-1} \text{h}^{-1}$             |                 |              |                  |
| 7         | ZnCoDETPP                       | 300W Xe Lamp           | -         | TEOA        | $43 \mu\text{mol h}^{-1}$                 | -               | 7.36         | 7                |
| 8         | 2%NP/g - $\text{C}_3\text{N}_4$ | 300W Xe Lamp           | -         | TEOA        | $2297 \mu\text{mol g}^{-1} \text{h}^{-1}$ | 15              | -            | 8                |
| 8         | PHPT-LG5                        | 450W Xe -lamp          | 7         | TEOA        | $4196 \mu\text{mol g}^{-1} \text{h}^{-1}$ | 8392            | 7.43         | 9                |
| 9         | PCT-LG-DfT                      | 450W Xe -lamp          | 7         | TEOA        | $6641 \mu\text{mol g}^{-1} \text{h}^{-1}$ | 13282           | 61.13        | 10               |
| 10        | PCT-LG-tT                       | 450W Xe -lamp          | 7         | TEOA        | $7396 \mu\text{mol g}^{-1} \text{h}^{-1}$ | 14792           | 54.89        | 10               |
| <b>11</b> | <b>PCT-LG-22</b>                | <b>Xenon-300W Lamp</b> | <b>12</b> | <b>TEOA</b> | <b>8,850.9</b>                            | <b>11,801.2</b> | <b>15.67</b> | <b>This work</b> |
| <b>12</b> | <b>PCT-LG-23</b>                | <b>Xenon-300W Lamp</b> | <b>3</b>  | <b>TEOA</b> | <b>9,793.5</b>                            | <b>13,058</b>   | <b>17.34</b> | <b>This work</b> |

#### References:

- Chen, Z.; Wang, J.; Zhang, S.; Zhang, Y.; Zhang, J.; Li, R.; Peng, T. Porphyrin-Based Conjugated Polymers as Intrinsic Semiconducting Photocatalysts for Robust  $\text{H}_2$  Generation under Visible Light. *ACS Appl. Energy Mater.* **2019**, *2*, 5665-5676.
- Yuan, Y. J.; Chen, D.; Zhong, J.; Yang, L. X.; Wang, J. J.; Yu, Z. T.; Zou, Z. G. Construction of a Noble-Metal-Free Photocatalytic  $\text{H}_2$  Evolution System using  $\text{MoS}_2$ /Reduced Graphene Oxide Catalyst and Zin-Porphyrin Photosensitizer. *J. Phys.Chem.C.* **2017**, *121*, 24452-24462.
- Yuan, Y.; Lu, H.; Ji, Z.; Zhong, J.; Ding, M.; Chen, D.; Li, Y.; Tu, W.; Cao, D.; Yu, Z.; Zou, Z. Enhanced visible-light-induced hydrogen evolution from water in a noble-metal-free system catalyzed by ZnTCPP- $\text{MoS}_2$ /TiO<sub>2</sub> assembly, *Chemical Engineering Journal*, **2015**, *275*, 8-16.
- Ho, P. Y.; Mark, M. F.; Wang, Y.; Yiu, S. C.; Yu, W. H.; Ho, C. L.; McCamant, D. W.; Eisenberg, R.; Huang, S. Panchromatic Sensitization Using Zn(II) Porphyrin-Based Photosensitizers for Light-Driven Hydrogen Production in Water. *ChemSusChem*, **2018**, *11*, 2517-2528.



5. Liao, P.; Hu, Y.; Liang, Z.; Zhang, J.; Yang, H.; He, L. Q.; Tong, Y, X.; Liu, J. M.; Chen, L.; Su, C. Y. Porphyrin-based imine gels for enhanced visible-light photocatalytic hydrogen production. *J. Mater. Chem. A*, **2018**, *6*, 3195-3201.
6. Huang, L. Y.; Huang, J. F.; Lei, Y.; Qin, S.; Liu, J. M. Porous Hybrid materials based on Mesotetrakis(Hydroxyphenyl) Porphyrins and TiO<sub>2</sub> for efficient Visible-Light-Driven hydrogen production. *Catalysts*, **2020**, *10*, 656.
7. Chen, Z.; Wang, J.; Zhang, S.; Zhang, Y.; Zhang, J.; Li, R.; Peng, T. Porphyrin-Based Conjugated Polymers as Intrinsic Semiconducting Photocatalysts for Robust H<sub>2</sub> Generation under Visible Light, *ACS Applied Energy Materials* **2019**, *2*, 5665-5676.
8. Li, L.; Bodedla, G. B.; Liu, Z.; Zhu, X. Naphthalimide-porphyrin hybridized graphitic carbon nitride for enhanced photocatalytic hydrogen production, *Applied surface sciences*, **2020**, *499*, 143755.
9. Gonuguntla, S.; Tiwari, A.; Madanaboina, S.; Lingamallu, G.; Pal, U. Revealing high hydrogen evolution activity in zinc porphyrin sensitized hierarchical porous TiO<sub>2</sub> photocatalysts. *International Journal of hydrogen energy*, **2020**, *45*, 7508-7516.
10. Gangadhar, P. S.; Gonuguntla, S.; Madanaboina, S.; Islavath, N.; Pal, U.; Giribabu, L. Unravelling the impact of thiophene auxiliary in new porphyrin sensitizers for high solar energy conversion. *Journal of Photochemistry and Photobiology A: Chemistry*, **2020**, *392*, 112408.
